# Supplementary material for: A COVID-19 Outbreak in a Large Meat-Processing Plant in England: Transmission Risk Factors and Controls
Source: MDPI journal article supplement (doi:10.3390/ijerph20196806), 2023-09-22
Supplement: s1 [file s1]

## SUPPLEMENTARY MATERIAL

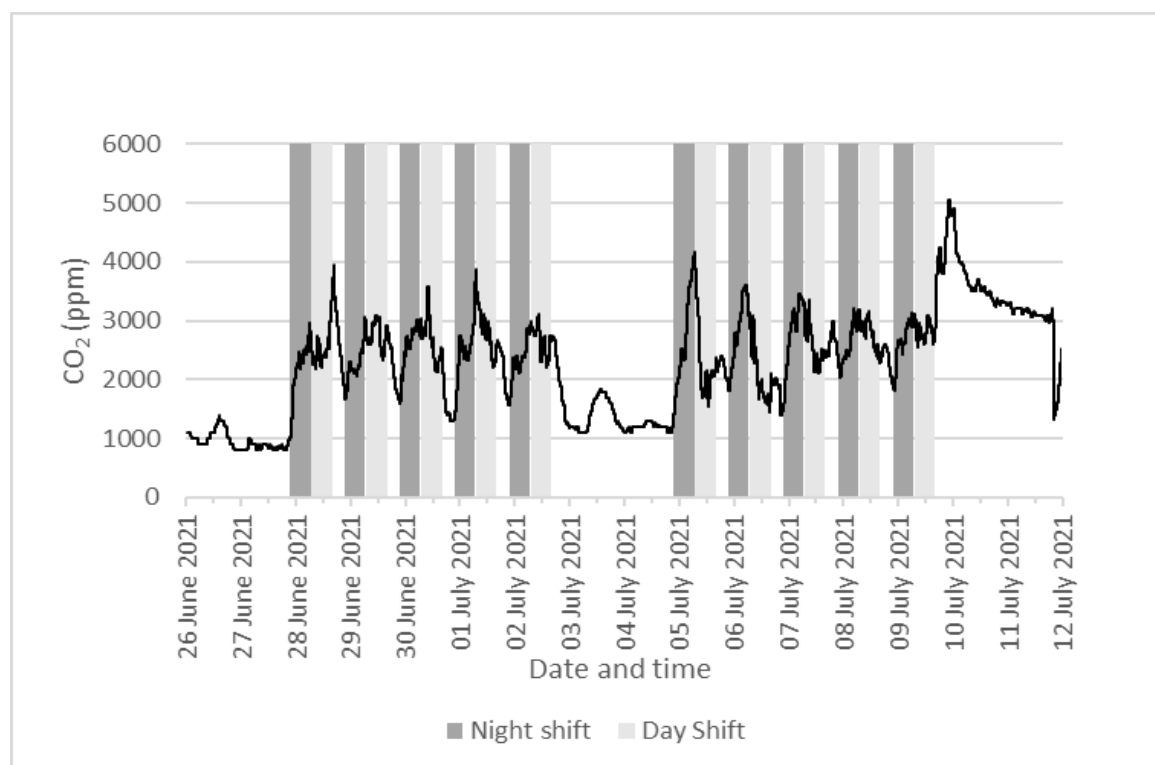

**Figure S1:** Real-time CO<sub>2</sub> measurements in the cut-preparation area of the meat processing plant between 25 June 2021 and 11 July 2021. The line graph shows 30-minute rolling average of CO<sub>2</sub> concentrations. The dark grey area covers night-shift time (Sunday – Friday, 21:30-06:30), the light grey area covers day-shift time (Monday – Friday, 07:00-16:00), and the white area is no working shift. This area was separated by flexible plastic drapes from the main production area (A) where CO<sub>2</sub> was used in the packaging process. Due to the potential influence of the exogenous CO<sub>2</sub> sources from the adjacent main production area, the CO<sub>2</sub> measurements in this area could not be used to assess the adequacy of ventilation. At some point, the instrument used to measure CO<sub>2</sub> was contaminated with chicken debris and might affect the reading after 09 July, which did not decrease significantly at the weekend. Therefore, the peak reading of 5100ppm on 10 July could be a measurement error.

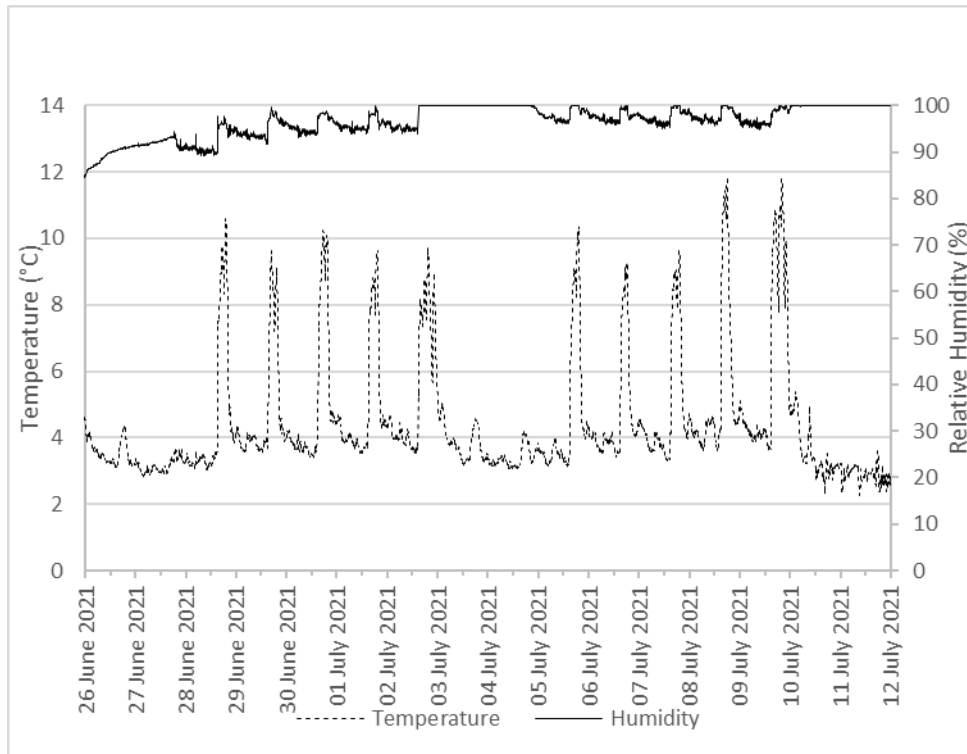

**Figure S2:** Real-time measurements of temperature and relative humidity (RH) in the cut-preparation area of the meat processing plant between 25 June 2021 and 11 July 2021. The top line graph shows RH with a mean of 95.9% (range: 67.5-100%). The lower line graph shows the room temperature changes with a mean 4.5°C (range: 2.3-11.9°C).

**Table S1:** Measurement results of the workplace environmental conditions in the meat processing plant following a COVID-19 outbreak. Spot measurements were conducted between 9.30 and 12.00 on 25 June 2021, and real-time measurements were carried out between 25 June and 11 July 2021.

| Site area                                                                          | Spot measurements                    |                  |                  |
|------------------------------------------------------------------------------------|--------------------------------------|------------------|------------------|
|                                                                                    | Noise level (dB(A))                  |                  |                  |
| Meat material intake                                                               | 80                                   |                  |                  |
| Main production area A, in-between conveyors                                       | 81                                   |                  |                  |
| Packing area                                                                       | 83                                   |                  |                  |
|                                                                                    | CO <sub>2</sub> level (ppm)          |                  |                  |
| Main production area A by packing line machines <sup>a</sup>                       | 2800                                 |                  |                  |
| Meat material intake <sup>a</sup>                                                  | 2500                                 |                  |                  |
| Raised central area of production area B <sup>a</sup>                              | 2500                                 |                  |                  |
| Cut-preparation area by cutting bench beneath conveyor <sup>b</sup>                | 2300                                 |                  |                  |
| Main corridor towards production areas and main washing areas <sup>b</sup>         | 1900                                 |                  |                  |
| Washing area by the sinks between office area and production entrance <sup>b</sup> | 1500                                 |                  |                  |
| Lobby by the hand wash at the entrance to the production areas <sup>b</sup>        | 1200                                 |                  |                  |
| Production exit to the lobby by the entrance to the changing areas                 | 1000                                 |                  |                  |
| Main locker                                                                        | 1000                                 |                  |                  |
| Engineering workshop                                                               | 800                                  |                  |                  |
| Site area                                                                          | Real-time measurements, mean & range |                  |                  |
|                                                                                    | CO <sub>2</sub> level (ppm)          | Temperature (°C) | Humidity (%RH)   |
| Cut-preparation area by cutting bench beneath conveyor <sup>b</sup>                | 2268 (400-4100)                      | 4.5 (2.3-11.9)   | 95.9 (67.5-100)  |
| Main washing area for production staff <sup>b</sup>                                | 605 (300-1800)                       | 16.7 (13.7-19.4) | 69.1 (55.0-83.2) |
| Washing area above sinks at the office-production entrance <sup>b</sup>            | 1126 (400-2500)                      | 10.9 (8.9-13.4)  | 59.4 (49.6-77.9) |
| Canteen, on top of vending machines                                                | 388 (300-800)                        | 20.7 (16.7-27.6) | 65.1 (33.6-81.9) |
| Main locker room near main entrance area                                           | 516 (300-1400)                       | 18.6 (16.1-27.6) | Error reading    |

<sup>a</sup> These were the main production areas where CO<sub>2</sub> was used in the packaging process. <sup>b</sup> These were areas connected to the main production areas. The CO<sub>2</sub> readings from both a and b areas cannot be used to assess the adequacy of ventilation.
